# Supplementary material
Source: HighWire-hosted journal article supplement (doi:10.1101/rna.068916.118)
Supplement: Supplemental_Figures_Table_Legends.docx [file Supplemental_Figures_Table_Legends.docx]

**Supplemental Figure 1.** ALN-F12 led to dose-dependent reduction of both plasma FXII protein and liver *F12* mRNA levels in mice and rats

C57BL/6J mice and Sprague Dawley rats were subcutaneously administer a single dose of ALN-F12 at different dose levels (n=3 per group). 10 days post dosing, liver *F12* mRNA levels were measured by RT-QPCR normalized to GAPDH. Plasma FXII protein levels were measured by ELISA. The calculated plasma FXII concentrations for the test groups were then normalized to the average of the PBS-treated group

**Supplemental Figure 2.** Inhibition of ACE inhibitor-induced vascular permeability following single-dose subcutaneous administration of PK-siRNA.

Female C57BL/6J mice were subcutaneously administered a single dose of PK-siRNA at dose levels of 0, 0.3, 1, 3, or 10 mg/kg (n=10 per group). The rest procedures are as described in the legend of Figure 3

**Supplemental Figure 3.** Inhibition of ACE inhibitor-induced vascular permeability following single-dose subcutaneous administration of HK-siRNA.

Female C57BL/6J mice were subcutaneously administered a single dose of HK-siRNA at dose levels of 0, 0.3, 1, 3, or 10 mg/kg (n=10 per group). The rest procedures are as described in the legend of Figure 3

**Supplemental Figure 4.** PK-siRNA or HK-siRNA Rescued Mustard Oil-Induced Vascular Permeability in a C1INH knockdown Mouse Model

Female CD1 mice were subcutaneously dosed with a siRNA targeting C1INH (10 mg/kg) plus HK-siRNA or HK-siRNA at 10 mg/kg (n=10 per group). The rest procedures are as described in the legend of Figure 4.

**Supplemental Figure 5.** Decreased HK cleavage in ALN-F12 treated Cynomolgus plasma

The representative Cynomolgus plasma from ALN-F12 Cyno study (WIL-268503, Ohio) were activated at 2 μg/mL Kaolin, 37ºC, 10 min, mixed with LDS-loading dye and loaded into SDS-PAGE for Western Blot analysis. The un-cleaved full-length HK signal ratio of kaolin treatment to no kaolin treatment is represented in the chart below. FXII levels were normalized to pre-dose plasma FXII band.

**Supplemental Table 1A**

**Initial *in vitro* screening of GalNAc-siRNAs targeting F12.** Hep3B cells and primary mouse hepatocytes were transfected with F12-siRNA candidates (79 in total) at 10 nM or 0.1 nM. 24 hours post transfection, F12 mRNA levels were measured by RT-QPCR and normalized to vehicle control. Triplicate analysis for each condition.
