# Supplementary material
Source: HighWire-hosted journal article supplement (doi:10.1101/rna.068916.118)
Supplement: Supplemental_Tables.docx [file Supplemental_Tables.docx]

**Supplemental Table 1A**

**Initial *in vitro* screening of GalNAc-siRNAs targeting F12.** Hep3B cells and primary mouse hepatocytes were transfected with F12-siRNA candidates (79 in total) at 10 nM or 0.1 nM. 24 hours post transfection, F12 mRNA levels were measured by RT-QPCR and normalized to vehicle control. Triplicate analysis for each condition.

| **GalNAc-siRNA**  **(No.)** | **F12-mRNA levels normalized to untreated control (%)** | | | | | | | |
| --- | --- | --- | --- | --- | --- | --- | --- | --- |
| **Hep3B cells** | | | | **Primary Mouse Hepatocytes** | | | |
| **10 nM** | | **0.1 nM** | | **10 nM** | | **0.1 nM** | |
| **Mean** | **STD** | **Mean** | **STD** | **Mean** | **STD** | **Mean** | **STD** |
| **1** | 25.51 | 5.82 | 52.95 | 16.62 | 65.59 | 1.56 | 105.59 | 11.31 |
| **2** | 33.64 | 5.10 | 53.89 | 4.92 | 89.93 | 6.80 | 105.97 | 6.11 |
| **3** | 33.18 | 2.58 | 56.65 | 12.64 | 4.11 | 0.30 | 22.26 | 2.33 |
| **4** | 31.62 | 3.94 | 57.29 | 12.45 | 88.04 | 11.74 | 98.51 | 8.41 |
| **5** | 33.92 | 10.43 | 57.38 | 12.57 | 69.78 | 8.20 | 97.02 | 10.59 |
| **6** | 22.27 | 7.65 | 58.54 | 11.79 | 106.77 | 11.24 | 105.96 | 14.79 |
| **7** | 47.38 | 2.88 | 59.37 | 10.58 | 65.93 | 11.56 | 93.02 | 11.87 |
| **8** | 50.26 | 7.92 | 59.88 | 10.04 | 94.40 | 7.02 | 103.07 | 15.91 |
| **9** | 30.33 | 2.57 | 60.23 | 5.86 | 4.76 | 0.53 | 55.50 | 2.59 |
| **10** | 44.32 | 11.45 | 63.20 | 22.27 | 2.15 | 0.34 | 18.67 | 3.58 |
| **11** | 40.60 | 6.48 | 67.16 | 15.42 | 11.27 | 5.36 | 73.87 | 7.86 |
| **12** | 42.65 | 5.18 | 69.43 | 6.97 | 10.91 | 2.07 | 85.76 | 4.58 |
| **13** | 27.61 | 3.38 | 69.76 | 4.34 | 66.51 | 8.90 | 91.99 | 8.98 |
| **14** | 34.85 | 13.15 | 70.16 | 11.08 | 4.18 | 0.40 | 75.33 | 6.68 |
| **15** | 51.11 | 6.32 | 72.10 | 16.53 | 79.57 | 6.78 | 112.80 | 16.47 |
| **16** | 26.48 | 2.67 | 72.11 | 18.34 | 2.54 | 0.37 | 30.46 | 3.18 |
| **17** | 45.31 | 13.50 | 72.80 | 16.08 | 5.65 | 0.71 | 47.98 | 5.10 |
| **18** | 34.03 | 7.75 | 72.92 | 14.90 | 93.61 | 4.14 | 110.88 | 6.83 |
| **19** | 39.47 | 8.51 | 73.34 | 12.41 | 7.40 | 3.68 | 48.44 | 7.30 |
| **20** | 54.80 | 4.81 | 73.94 | 3.02 | 61.80 | 5.53 | 89.03 | 8.87 |
| **21** | 40.21 | 8.96 | 74.88 | 8.34 | 118.31 | 5.79 | 96.50 | 8.38 |
| **22** | 30.76 | 4.36 | 75.59 | 5.39 | 56.78 | 3.53 | 107.21 | 8.85 |
| **23** | 42.10 | 8.06 | 76.01 | 5.90 | 72.76 | 4.81 | 88.67 | 5.54 |
| **24** | 48.83 | 7.54 | 77.75 | 3.19 | 12.01 | 0.57 | 77.58 | 4.48 |
| **25** | 49.33 | 16.60 | 78.11 | 9.09 | 9.07 | 1.26 | 90.25 | 6.13 |
| **26** | 31.26 | 5.10 | 78.16 | 6.43 | 84.03 | 10.18 | 98.77 | 9.83 |
| **27** | 40.76 | 3.82 | 81.72 | 11.46 | 96.05 | 3.15 | 108.95 | 15.98 |
| **28** | 43.94 | 9.08 | 82.05 | 15.38 | 117.54 | 17.29 | 95.48 | 4.87 |
| **29** | 45.43 | 13.39 | 82.32 | 18.52 | 14.58 | 1.25 | 106.83 | 8.65 |
| **30** | 42.14 | 5.32 | 82.32 | 8.55 | 38.55 | 4.10 | 79.09 | 4.98 |
| **31** | 57.08 | 8.06 | 82.49 | 4.07 | 9.29 | 0.92 | 76.46 | 7.78 |
| **32** | 34.57 | 6.58 | 83.12 | 23.31 | 121.41 | 15.18 | 109.34 | 6.56 |
| **33** | 62.24 | 9.61 | 85.29 | 13.23 | 97.44 | 16.48 | 114.55 | 17.02 |
| **34** | 52.93 | 6.95 | 86.68 | 6.28 | 87.49 | 3.65 | 102.98 | 3.19 |
| **35** | 30.87 | 4.86 | 86.89 | 27.34 | 8.69 | 1.11 | 79.02 | 6.21 |
| **36** | 33.07 | 5.32 | 88.38 | 12.60 | 93.08 | 2.04 | 102.57 | 6.58 |
| **37** | 74.65 | 14.32 | 88.83 | 15.84 | 106.80 | 8.83 | 98.51 | 5.21 |
| **38** | 64.88 | 9.84 | 89.42 | 1.94 | 89.44 | 8.85 | 103.72 | 4.17 |
| **39** | 46.05 | 7.53 | 91.85 | 17.35 | 12.59 | 2.13 | 80.53 | 6.22 |
| **40** | 36.48 | 7.98 | 91.93 | 12.70 | 100.13 | 7.58 | 109.63 | 8.42 |
| **41** | 79.07 | 12.98 | 93.64 | 24.70 | 3.94 | 1.92 | 30.63 | 4.88 |
| **42** | 47.16 | 7.39 | 94.90 | 7.50 | 14.38 | 0.69 | 95.66 | 13.85 |
| **43** | 53.15 | 3.78 | 94.94 | 10.88 | 5.08 | 0.36 | 48.49 | 6.16 |
| **44** | 52.97 | 6.44 | 95.67 | 2.15 | 18.80 | 6.17 | 80.58 | 4.33 |
| **45** | 49.63 | 8.37 | 98.00 | 31.22 | 7.18 | 0.47 | 88.75 | 3.65 |
| **46** | 47.04 | 8.78 | 100.98 | 7.88 | 13.43 | 1.30 | 89.95 | 2.00 |
| **47** | 78.38 | 14.27 | 101.40 | 16.13 | 71.13 | 6.77 | 105.69 | 18.18 |
| **48** | 59.79 | 1.16 | 101.75 | 5.41 | 7.21 | 0.87 | 69.20 | 4.12 |
| **49** | 66.36 | 4.90 | 103.24 | 11.98 | 2.27 | 0.56 | 45.86 | 4.76 |
| **50** | 75.01 | 10.08 | 104.52 | 12.45 | 9.17 | 1.67 | 85.74 | 10.67 |
| **51** | 37.87 | 3.98 | 104.71 | 19.73 | 89.49 | 13.66 | 112.92 | 8.88 |
| **52** | 53.32 | 19.56 | 105.00 | 9.59 | 109.13 | 16.40 | 106.97 | 10.31 |
| **53** | 95.69 | 7.82 | 106.86 | 6.81 | 7.93 | 1.08 | 79.26 | 7.63 |
| **54** | 83.91 | 4.60 | 107.17 | 14.12 | 7.14 | 0.73 | 68.06 | 6.90 |
| **55** | 54.98 | 14.67 | 107.25 | 31.67 | 103.90 | 11.47 | 105.29 | 15.21 |
| **56** | 55.44 | 7.85 | 107.57 | 23.01 | 92.00 | 18.09 | 103.37 | 8.43 |
| **57** | 82.97 | 5.94 | 107.70 | 14.93 | 14.46 | 5.82 | 95.13 | 8.00 |
| **58** | 48.94 | 4.14 | 108.12 | 9.53 | 72.30 | 7.44 | 89.14 | 8.51 |
| **59** | 108.24 | 22.33 | 109.22 | 15.20 | 2.84 | 1.36 | 33.51 | 5.52 |
| **60** | 45.03 | 7.20 | 109.54 | 24.98 | 3.61 | 0.70 | 73.57 | 1.75 |
| **61** | 88.44 | 10.32 | 110.31 | 11.04 | 12.19 | 5.22 | 74.59 | 8.71 |
| **62** | 91.13 | 3.10 | 110.67 | 2.87 | 46.49 | 2.30 | 96.80 | 7.92 |
| **63** | 64.06 | 4.12 | 110.77 | 9.70 | 5.44 | 0.96 | 64.57 | 5.85 |
| **64** | 73.93 | 14.61 | 111.04 | 7.84 | 6.05 | 0.43 | 69.44 | 7.89 |
| **65** | 109.71 | 9.91 | 111.39 | 15.97 | 37.09 | 4.33 | 105.92 | 16.75 |
| **66** | 115.10 | 15.76 | 112.17 | 15.40 | 67.56 | 6.96 | 106.54 | 6.57 |
| **67** | 73.64 | 2.82 | 115.81 | 16.26 | 26.68 | 1.94 | 99.86 | 4.45 |
| **68** | 105.49 | 9.47 | 116.14 | 13.26 | 17.08 | 2.86 | 95.43 | 7.28 |
| **69** | 75.17 | 13.78 | 117.45 | 12.41 | 6.95 | 3.27 | 69.76 | 3.26 |
| **70** | 97.88 | 10.77 | 119.84 | 20.61 | 3.32 | 0.57 | 38.04 | 5.21 |
| **71** | 160.91 | 16.98 | 120.55 | 10.12 | 16.10 | 2.67 | 93.19 | 11.97 |
| **72** | 94.23 | 12.54 | 121.59 | 9.88 | 3.10 | 0.57 | 51.20 | 7.39 |
| **73** | 74.76 | 12.11 | 126.23 | 28.21 | 17.74 | 2.26 | 102.55 | 6.06 |
| **74** | 121.52 | 29.42 | 126.31 | 31.35 | 3.65 | 0.99 | 55.42 | 9.18 |
| **75** | 119.20 | 11.93 | 127.54 | 12.33 | 1.84 | 0.27 | 26.98 | 1.95 |
| **76** | 104.81 | 13.95 | 128.27 | 19.40 | 15.41 | 0.59 | 100.52 | 12.23 |
| **77** | 90.83 | 7.34 | 130.84 | 7.66 | 3.28 | 0.48 | 63.68 | 7.51 |
| **78** | 102.48 | 0.83 | 131.61 | 29.20 | 23.02 | 4.01 | 105.93 | 4.92 |
| **79** | 103.35 | 6.65 | 136.68 | 15.93 | 17.64 | 2.12 | 94.07 | 8.71 |
| **Control siRNA** | 96.09 | 6.23 |  |  | 94.30 | 7.02 |  |  |
| **Untreated** | 100.00 | 11.92 |  |  | 100.00 | 6.56 |  |  |

**Supplemental Table 1B**

**Secondary candidates *in vitro* screening** 12 siRNA duplexes from first screening (Sup Table 1A) were selected to repeat transfection to Hep3B and primary mouse hepatocytes at different concentrations (ranging from 0.99 fM to 10 nM). F12-mRNA levels were measured by RT-QPCR 24 hours post transfection. IC50 were calculated. Triplicate analysis for each condition.

| **GalNAc-siRNA**  **(No.)** | **F12-mRNA levels normalized to untreated control (%)** | | | | | | | | | |
| --- | --- | --- | --- | --- | --- | --- | --- | --- | --- | --- |
| **Hep 3b** | | | | | **Primary Mouse Hepatocytes** | | | | |
| **10 nM** | | **0.1 nM** | | **IC50** | **10 nM** | | **0.1 nM** | | **IC50** |
| **Mean** | **STD** | **Mean** | **STD** | **Mean** | **STD** | **Mean** | **STD** |
| **1** | 25.50 | 5.80 | 52.90 | 16.60 | 0.66 | 65.60 | 1.60 | 105.60 | 11.30 | N/A |
| **2** | 33.60 | 5.10 | 53.90 | 4.90 | 0.48 | 89.90 | 6.80 | 106.00 | 6.10 | N/A |
| **3** | 33.20 | 2.60 | 56.70 | 12.60 | 0.09 | 4.10 | 0.30 | 22.30 | 2.30 | 0.05 |
| **4** | 31.60 | 3.90 | 57.30 | 12.50 | 0.09 | 88.00 | 11.70 | 98.50 | 8.40 | N/A |
| **5** | 33.90 | 10.40 | 57.40 | 12.60 | 0.09 | 69.80 | 8.20 | 97.00 | 10.60 | N/A |
| **6** | 22.30 | 7.60 | 58.50 | 11.80 | 0.24 | 106.80 | 11.20 | 106.00 | 14.80 | N/A |
| **9** | 30.30 | 2.60 | 60.20 | 5.90 | 0.46 | 4.80 | 0.50 | 55.50 | 2.60 | 1.01 |
| **10** | 44.30 | 11.40 | 63.20 | 22.30 | 0.06 | 2.10 | 0.30 | 18.70 | 3.60 | 0.23 |
| **11** | 40.60 | 6.50 | 67.20 | 15.40 | N/A | 11.30 | 5.40 | 73.90 | 7.90 | 14.96 |
| **12** | 42.70 | 5.20 | 69.40 | 7.00 | N/A | 10.90 | 2.10 | 85.80 | 4.60 | 3.57 |
| **14** | 34.90 | 13.10 | 70.20 | 11.10 | 0.40 | 4.20 | 0.40 | 75.30 | 6.70 | 1.10 |
| **16** | 26.50 | 2.70 | 72.10 | 18.30 | 0.09 | 2.50 | 0.40 | 30.50 | 3.20 | 0.12 |

**Supplemental Table 1C**

***In vivo* screening of the final 6 *F12*-siRNAs.** GalNAc-siRNAs with two different chemical modifications for duplexes No. 3, 10 and 16 (Mod-1 & Mod-2) were applied into *in vivo* pharmacodynamic investigation in wild type female mice (n=3 per group). 10 days after 1 or 10 mg/kg single dose subcutaneous administration, animal livers were collected and *F12*-mRNA levels were measured and normalized to the average of vehicle control group. Duplex No. 16 (Mod-1) was selected as development candidate, ALN-F12.

| **GalNAc-siRNA** | | **Liver F12 mRNA levels normalized to vehicle control (%)** | | | |
| --- | --- | --- | --- | --- | --- |
| **1 mg/kg** | | **10 mg/kg** | |
| **Mean** | **STD** | **Mean** | **STD** |
| **3** | **Mod-1** | 22.2 | 1 | 8.5 | 0.2 |
| **Mod-2** | 18.1 | 6.3 | 11.9 | 3.9 |
| **10** | **Mod-1** | 29.9 | 5.5 | 4.4 | 0.2 |
| **Mod-2** | 41.2 | 6.7 | 10.1 | 0.2 |
| **16** | **Mod-1** | 21.2 | 2 | 5.5 | 0.2 |
| **Mod-2** | 31.7 | 2.4 | 8.6 | 0.3 |

| **Compound** | **Strand** | **Calculated MW (Da)** | **MW observed by MS (Da)** | **Purity (IPRP-HPLC)** | **Endotoxin** |
| --- | --- | --- | --- | --- | --- |
| **ALN-F12** | S AS | 8757  7546 | 8755  7544 | >99% | <0.02 EU/mg |
| **KLKB1-siRNA** | S AS | 8766  7587 | 8764  7589 | >99% | <0.02 EU/mg |
| **HK-siRNA** | S AS | 8875  7537 | 8873  7535 | >99% | <0.02 EU/mg |
| **C1INH-siRNA** | S AS | 8763  7603 | 8764  7601 | >99% | <0.02 EU/mg |

**Supplemental Table 2: Quality control of the GalNAc-siRNA conjugates**.
